# Supplementary material for: Lipase immobilization on UiO-66/poly(vinylidene fluoride) hybrid membranes and active catalysis in the vegetable oil hydrolysis
Source: Royal Society of Chemistry journal article supplement (doi:10.1039/d0nj03282d), 2020-01-01
Supplement: d0nj03282d1.pdf [file d0nj03282d1.pdf]

**Lipase immobilization on UiO-66/poly(vinylidene fluoride)  
hybrid membranes and active catalysis in vegetable oil  
hydrolysis**

Fenfen Zhu, Wei Xu, Xiao Li, Hao Meng, Yide Han, Junbiao Wu, Junli Xu, Yan Xu  
and Xia Zhang\*

*Faculty of Chemistry, Northeastern University, Shenyang 110819, China.*

\*Corresponding authors.

X. Zhang (Prof.) E-mail: xzhang@mail.neu.edu.cn.

Tel: +86 24 83687671

**Table S1** The detailed conditions for the synthesis of U-*x*/PVDF hybrid membranes

| membranes | m<br>(UiO-66 particles, g) | m<br>(PVDF, g) | m<br>(PVP, g) | V<br>(DMF, mL) |
|-----------|----------------------------|----------------|---------------|----------------|
| PVDF      | 0                          | 7.0            | 1.0           | 43.30          |
| U-1/PVDF  | 0.07                       | 6.93           | 1.0           | 42.87          |
| U-3/PVDF  | 0.21                       | 6.79           | 1.0           | 42.00          |
| U-10/PVDF | 0.70                       | 6.30           | 1.0           | 38.97          |
| U-15/PVDF | 1.05                       | 5.95           | 1.0           | 36.81          |

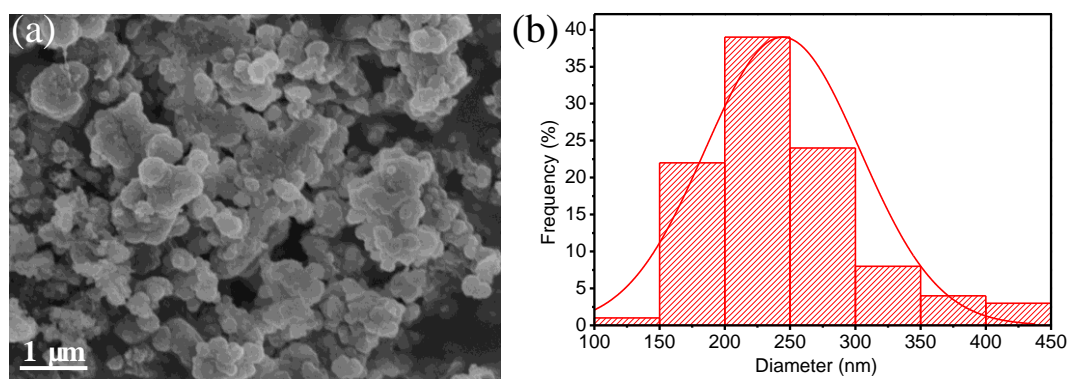

**Fig. S1** (a) SEM image of UiO-66 particles and (b) corresponding size distribution.

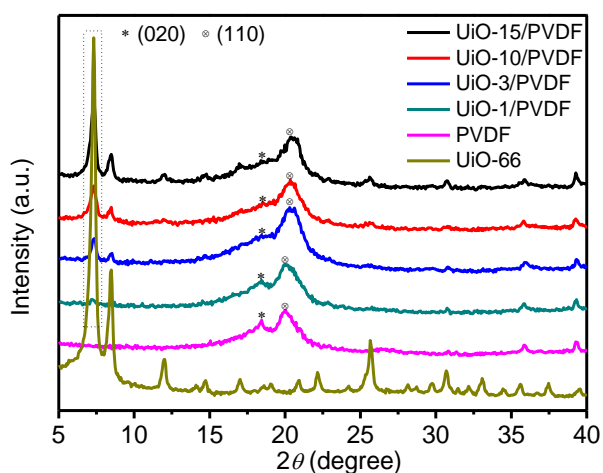

**Fig. S2** XRD patterns of pristine UiO-66, PVDF and U-*x*/PVDF hybrid membranes.

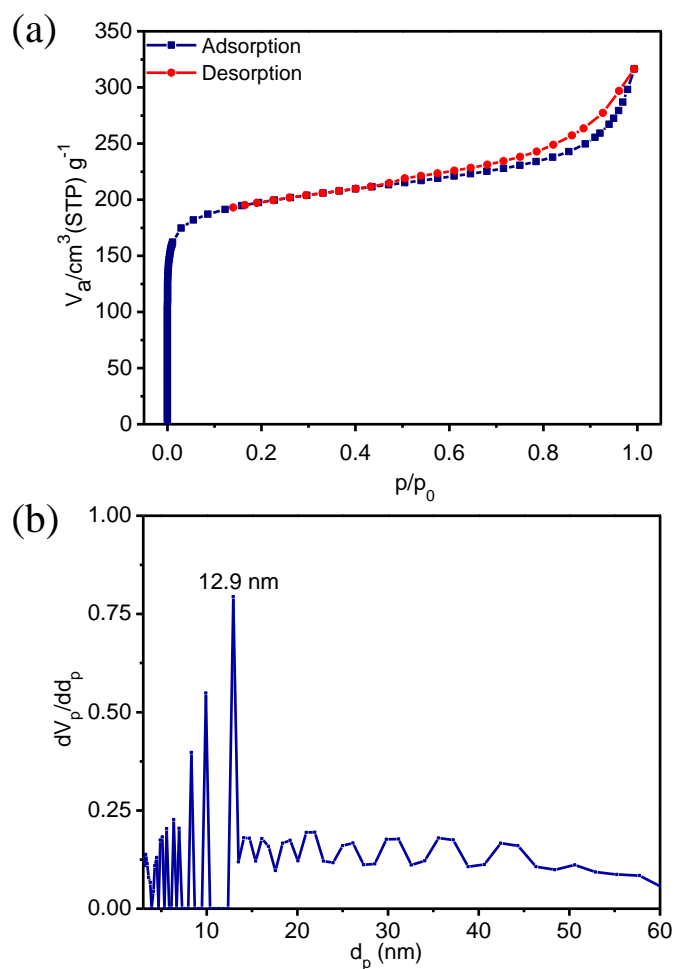

**Fig. S3** (a) N<sub>2</sub> adsorption-desorption curves and (b) corresponding pore size distribution of UiO-66 particles.

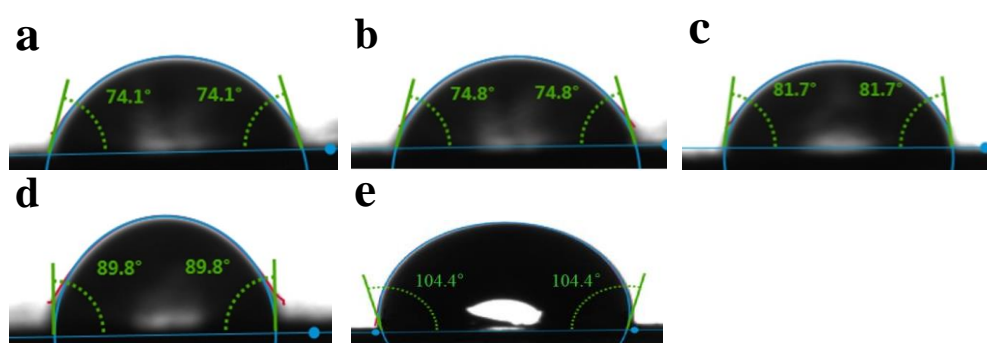

**Fig. S4** The surface water contact angle (CA) of PVDF (a) and U-*x*/PVDF (b-e): (b) U-1/PVDF; (c) U-3/PVDF; (d) U-10/PVDF; (e) U-15/PVDF.

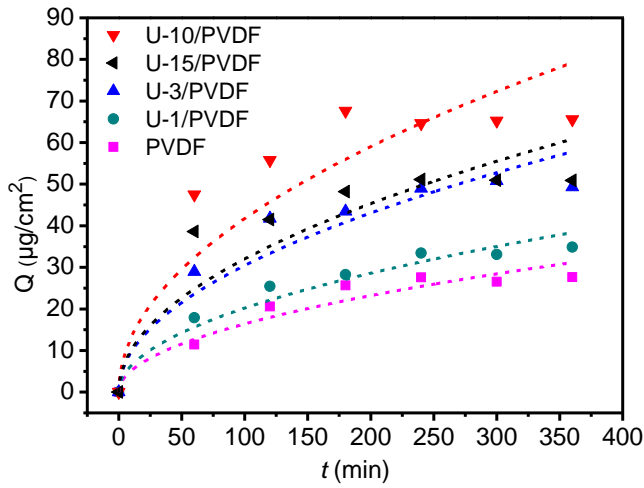

**Fig. S5** Non-linear fitting curves for the adsorption of lipase on PVDF and U-*x*/PVDF using intra-particle diffusion models.

**Table S2** The simulating parameters of adsorption kinetics of the membranes using three kinetics models

| Sample                   |                                                     | PVDF                  | U-1/PVDF              | U-3/PVDF              | U-10/PVDF             | U-15/PVDF             |
|--------------------------|-----------------------------------------------------|-----------------------|-----------------------|-----------------------|-----------------------|-----------------------|
| pseudo-first order       | $Q_e(\mu\text{g cm}^{-2})$                          | 29.08                 | 34.85                 | 50.07                 | 65.72                 | 50.08                 |
|                          | $k_1(\text{min}^{-1})$                              | 0.00997               | 0.01101               | 0.01414               | 0.02004               | 0.02114               |
|                          | $R^2$                                               | 0.98619               | 0.99191               | 0.99352               | 0.98882               | 0.98069               |
| pseudo-second order      | $Q_e(\mu\text{g cm}^{-2})$                          | 37.45                 | 43.23                 | 59.41                 | 73.23                 | 55.62                 |
|                          | $k_2(\text{cm}^2 \mu\text{g}^{-1} \text{min}^{-1})$ | $2.53 \times 10^{-4}$ | $2.71 \times 10^{-4}$ | $2.88 \times 10^{-4}$ | $4.31 \times 10^{-4}$ | $6.08 \times 10^{-4}$ |
|                          | $R^2$                                               | 0.97355               | 0.9949                | 0.99262               | 0.98717               | 0.99113               |
| Intra-particle diffusion | $k_d(\mu\text{g cm}^{-2} \text{min}^{-1/2})$        | 1.6419                | 2.0225                | 3.0473                | 4.1758                | 3.2067                |
|                          | $R^2$                                               | 0.93685               | 0.95934               | 0.90686               | 0.80021               | 0.81347               |

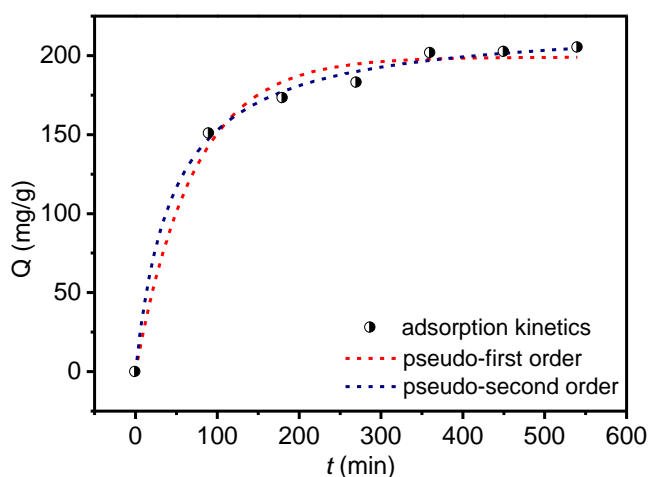

Fig. S6 Adsorption kinetics of lipase on UiO-66, and Non-linear fitting curves for the adsorption of lipase on UiO-66 using pseudo-first order and pseudo-second order models.

**Table S3** The simulating parameters of adsorption kinetics of lipase on UiO-66 using pseudo-first order and pseudo-second order models

| Kinetics model | pseudo-first order      |                        |         | pseudo-second order     |                                         |         |
|----------------|-------------------------|------------------------|---------|-------------------------|-----------------------------------------|---------|
|                | $Q_e(\text{mg g}^{-1})$ | $k_1(\text{min}^{-1})$ | $R^2$   | $Q_e(\text{mg g}^{-1})$ | $k_2(\text{g mg}^{-1} \text{min}^{-1})$ | $R^2$   |
| parameters     | 199.01                  | 0.01417                | 0.98617 | 221.63                  | $1.00189 \times 10^{-4}$                | 0.99628 |

**Table S4** Simulating parameters of the adsorption isotherm of lipase on U-10/PVDF hybrid membranes using Langmuir and Freundlich models

| Sample    | Langmuir                           |                                            |       | Freundlich                                                          |       |         |
|-----------|------------------------------------|--------------------------------------------|-------|---------------------------------------------------------------------|-------|---------|
|           | $q_m$<br>( $\mu\text{g cm}^{-2}$ ) | $K_L$<br>( $\text{mL } \mu\text{g}^{-1}$ ) | $R^2$ | $K_F$<br>( $\mu\text{g}^{(1-1/n)} \text{mL}^{1/n} \text{cm}^{-2}$ ) | $n$   | $R^2$   |
| U-10/PVDF | 75.31                              | 0.014                                      | 0.967 | 8.651                                                               | 3.017 | 0.88576 |

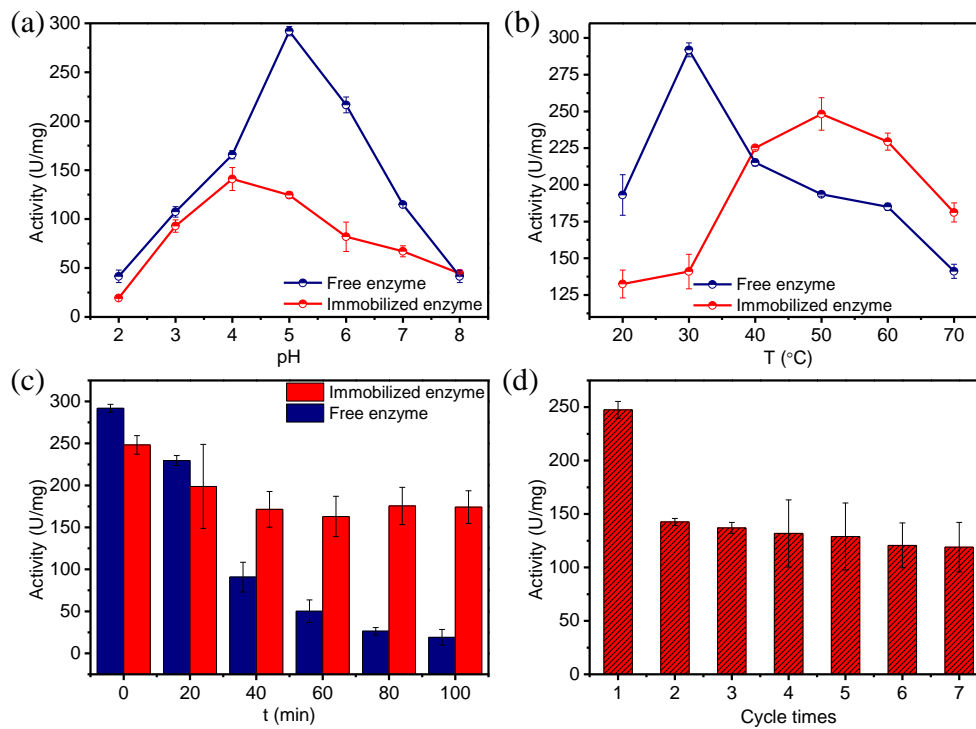

**Fig. S7** The absolute catalytic activities of immobilized and free lipase upon different conditions (a–c): (a) pH values in the range of 2.0–8.0; (b) Reaction temperature varied from 20 °C to 70 °C; (c) Thermostability comparison of free and membrane-immobilized lipase; (d) The cyclic catalytic activities of immobilized lipase.

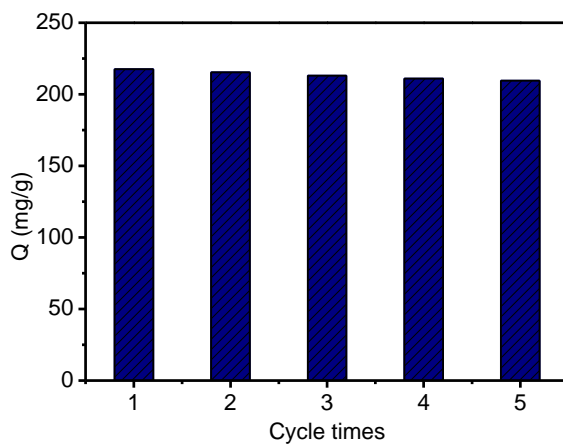

**Fig. S8** The cyclic adsorption of lipase on UiO-66.
